# Supplementary material
Source: PubMed Central journal article supplement (PMC7747328)
Supplement: 40820_2018_187_MOESM1_ESM.pdf [file 40820_2018_187_MOESM1_ESM.pdf]

Supporting Information for

## Efficient Carbon Based CsPbBr<sub>3</sub> Inorganic Perovskite Solar Cells by Using Cu-Phthalocyanine as Hole Transport Material

Zhiyong Liu<sup>1</sup>, Bo Sun<sup>1</sup>, Xingyue Liu<sup>1</sup>, Jinghui Han<sup>1</sup>, Haibo Ye<sup>1</sup>, Tielin Shi<sup>1</sup>, Zirong Tang<sup>1</sup>, Guanglan Liao<sup>1,2, \*</sup>

<sup>1</sup>State Key Laboratory of Digital Manufacturing Equipment and Technology, Huazhong University of Science and Technology, Wuhan 430074, People's Republic of China

<sup>2</sup>Flexible Electronics Research Center, Huazhong University of Science and Technology, Wuhan 430074, People's Republic of China

\*Corresponding author. E-mail: [guanglan.liao@hust.edu.cn](mailto:guanglan.liao@hust.edu.cn)

### Figures and Tables

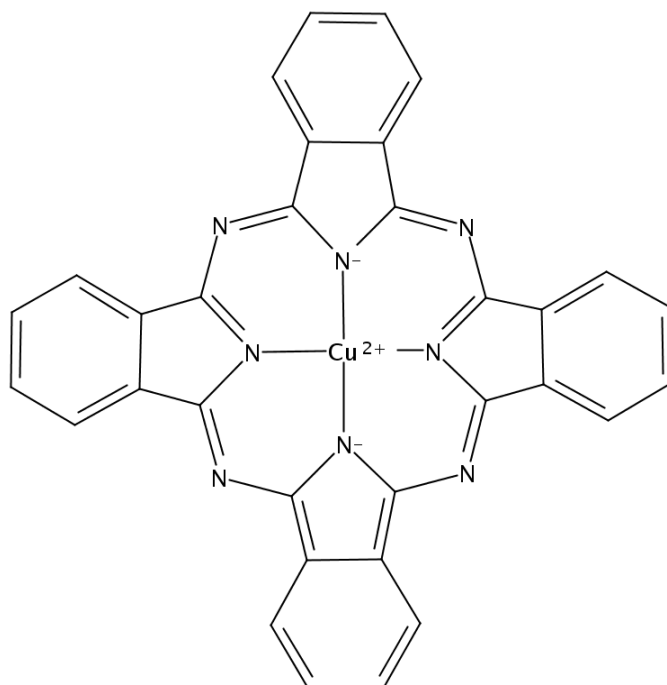

**Fig. S1** Molecular structure of copper phthalocyanine (CuPc)

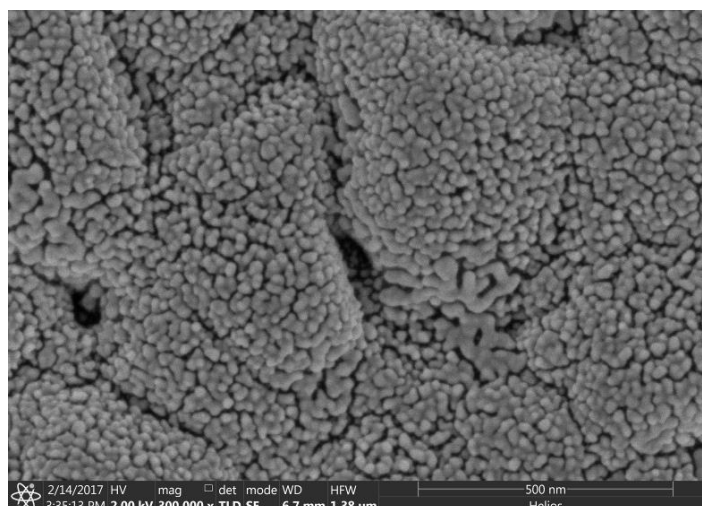

**Fig. S2** SEM image of top-view of the CsPbBr<sub>3</sub> layer deposited with CuPc under a big magnification

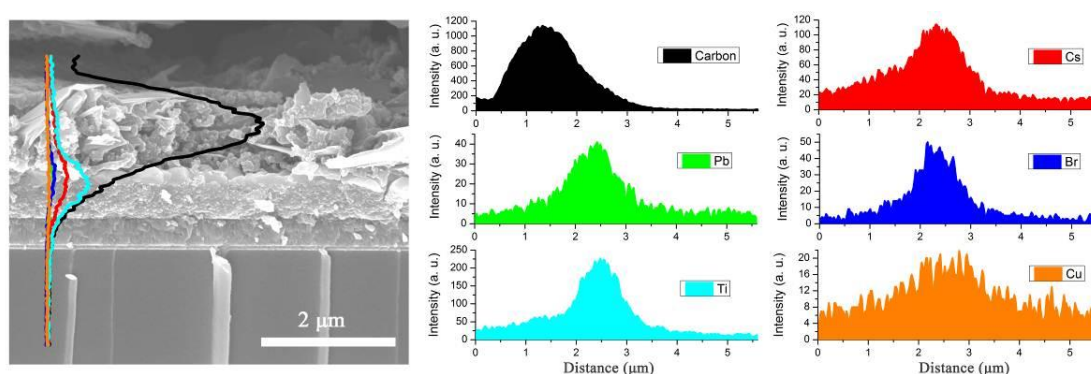

**Fig. S3** Distribution of components in the carbon based CsPbBr<sub>3</sub> PSC obtained by the line-scan analysis of EDX map

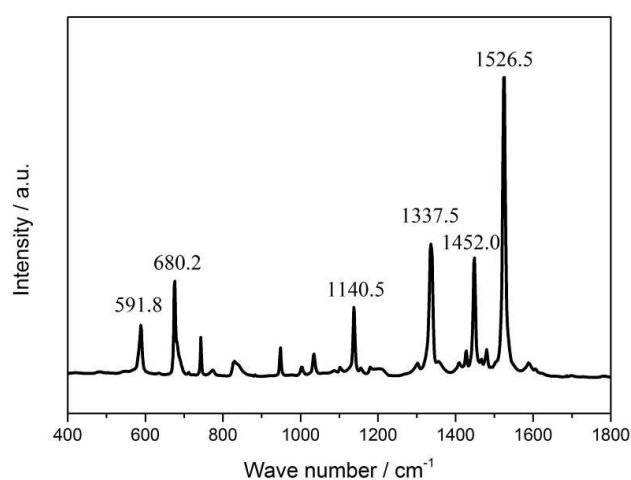

**Fig. S4** Raman spectra of the CuPc film deposited on glass substrate

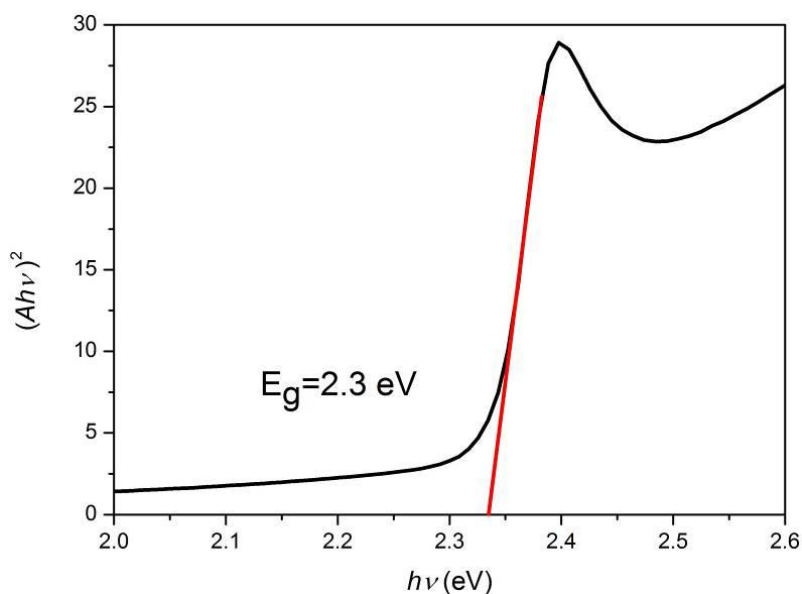

**Fig. S5**  $(Ah\nu)^2$  vs. energy ( $h\nu$ ) curve of CsPbBr<sub>3</sub> film calculated from the absorbance spectrum. The optical band gap of CsPbBr<sub>3</sub> is measured to be ~2.3 eV

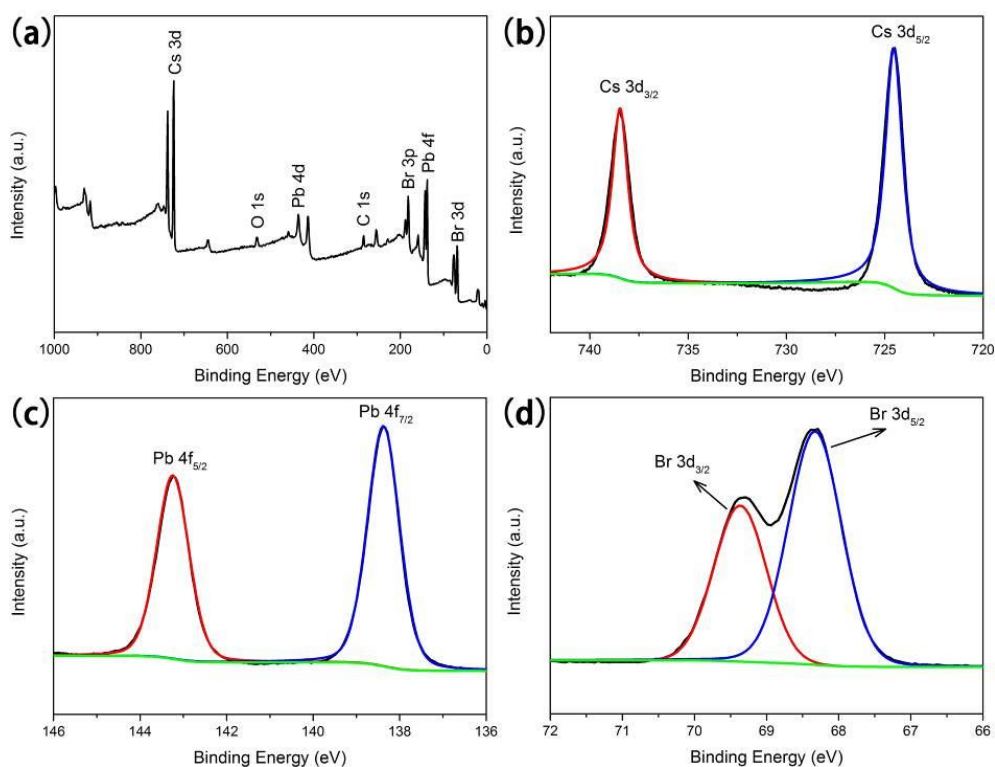

**Fig. S6** XPS characterizations of CsPbBr<sub>3</sub> film. **a** Survey XPS spectrum of CsPbBr<sub>3</sub> film. Corresponding high-resolution XPS spectra of the **b** Cs 3d, **c** Pb 4f and **d** Br 3d regions

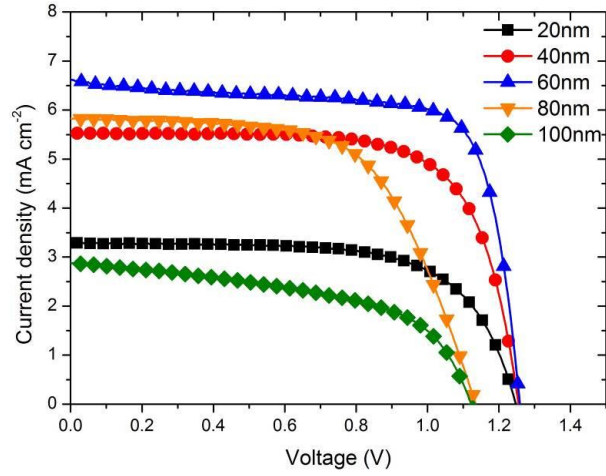

**Fig. S7**  $J$ - $V$  curves for the PSCs with different CuPc thickness

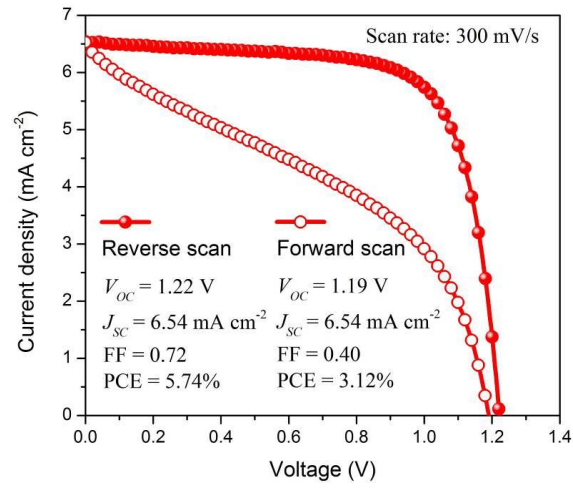

**Fig. S8**  $J$ - $V$  curves of the carbon based CsPbBr<sub>3</sub> PSC under both forward and reverse scans. The scan rate is 300 mV s<sup>-1</sup>

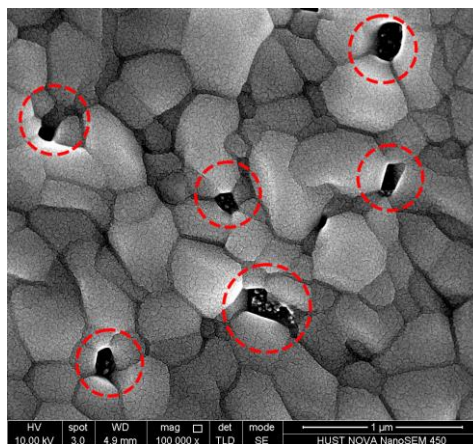

**Fig. S9** Pin-holes on the CsPbBr<sub>3</sub> perovskite surface

**Table S1** XPS binding energies and atomic ratios of Cs, Pb, and Br elements measured from the inorganic perovskite CsPbBr<sub>3</sub> layer

|                            | <b>Cs<br/>3d5/2</b> | <b>Cs<br/>3d3/2</b> | <b>Pb<br/>4f7/2</b> | <b>Pb<br/>4f5/2</b> | <b>Br<br/>3d5/2</b> | <b>Br<br/>3d3/2</b> |
|----------------------------|---------------------|---------------------|---------------------|---------------------|---------------------|---------------------|
| <b>Binding energy (eV)</b> | 724.5               | 738.4               | 138.4               | 143.2               | 68.3                | 69.3                |
| <b>Atomic ratio (%)</b>    | 21.4                |                     | 21.4                |                     | 57.2                |                     |

**Table S2** Parameters of the PSCs with different CuPc thickness

| <b>CuPc thickness<br/>(nm)</b> | <b><math>V_{oc}</math><br/>(V)</b> | <b><math>J_{sc}</math><br/>(mA cm<sup>-2</sup>)</b> | <b>FF</b> | <b>PCE<br/>(%)</b> |
|--------------------------------|------------------------------------|-----------------------------------------------------|-----------|--------------------|
| 20                             | 1.25                               | 3.27                                                | 0.67      | 2.74               |
| 40                             | 1.25                               | 5.53                                                | 0.71      | 4.93               |
| 60                             | 1.26                               | 6.62                                                | 0.74      | 6.21               |
| 80                             | 1.13                               | 5.83                                                | 0.62      | 4.07               |
| 100                            | 1.12                               | 2.88                                                | 0.53      | 1.72               |
